# Supplementary material for: Correlation of lithium ion distribution and X-ray absorption near-edge structure in O3- and O2-lithium cobalt oxides from first-principle calculation
Source: Royal Society of Chemistry journal article supplement (doi:10.1039/c2jm32024j), 2012-01-01
Supplement: c2jm32024j.pdf [file c2jm32024j.pdf]

*Supporting Information*

**Correlation of Lithium Ion Distribution and X-ray Absorption Near-Edge  
Structure in O3- and O2-Lithium Cobalt Oxides from First-Principle Calculation**

Toyoki Okumura, Yoichi Yamaguchi, Masahiro Shikano, and Hironori Kobayashi

*National Institute of Advanced Industrial Science and Technology, Ikeda, Osaka 563-  
8577, Japan*

Table S1. Crystallographic parameters and XANES simulating conditions

|                                     |                             |                                                |
|-------------------------------------|-----------------------------|------------------------------------------------|
| <u>O3-LiCoO<sub>2</sub></u>         | Space group:                | <i>R-3m</i>                                    |
|                                     | Unitcell formula:           | Li <sub>3</sub> Co <sub>3</sub> O <sub>6</sub> |
|                                     | Size of supercell:          | 3 × 3 × 1                                      |
| <i>k</i> -point grid <sup>b</sup> : | SCF (grand state)           | 12 × 12 × 12                                   |
|                                     | SCF & XANES (excited state) | 8 × 8 × 4                                      |

|                    |          |            |          |
|--------------------|----------|------------|----------|
| Lattice parameter: | <i>a</i> | <i>b</i>   | <i>c</i> |
|                    | 2.816    | = <i>a</i> | 14.054   |

|     |                                            |          |          |
|-----|--------------------------------------------|----------|----------|
|     | functional coordination of atomic position |          |          |
|     | <i>x</i>                                   | <i>y</i> | <i>z</i> |
| Li1 | 0                                          | 0        | 0        |
| Co1 | 0                                          | 0        | 1/2      |
| O1  | 0                                          | 0        | 0.2395   |

|                                           |                             |                                  |
|-------------------------------------------|-----------------------------|----------------------------------|
| <u>O1-Li<sub>0.5</sub>CoO<sub>2</sub></u> | Space group:                | <i>P2/m</i>                      |
|                                           | Unitcell formula:           | LiCo <sub>2</sub> O <sub>4</sub> |
|                                           | Size of supercell:          | 2 × 3 × 3                        |
| <i>k</i> -point grid <sup>b</sup> :       | SCF (grand state)           | 12 × 12 × 12                     |
|                                           | SCF & XANES (excited state) | 4 × 4 × 4                        |

|                    |             |          |          |
|--------------------|-------------|----------|----------|
| Lattice parameter: | <i>a</i>    | <i>b</i> | <i>c</i> |
|                    | 4.8653      | 2.8093   | 5.0633   |
|                    | β = 108.685 |          |          |

|     |                                            |          |          |
|-----|--------------------------------------------|----------|----------|
|     | functional coordination of atomic position |          |          |
|     | <i>x</i>                                   | <i>y</i> | <i>z</i> |
| Li1 | 0                                          | 0        | 0        |
| Co1 | 0                                          | 0        | 1/2      |
| Co2 | 0                                          | 1/2      | 1/2      |
| O1  | 0.2337                                     | 0        | 0.7066   |
| O2  | 0.7355                                     | 1/2      | 0.7058   |

|                                     |                             |                  |
|-------------------------------------|-----------------------------|------------------|
| <u>O1-CoO<sub>2</sub></u>           | Space group:                | <i>P-3m1</i>     |
|                                     | Unitcell formula:           | CoO <sub>2</sub> |
|                                     | Size of supercell:          | 3 × 3 × 3        |
| <i>k</i> -point grid <sup>b</sup> : | SCF (grand state)           | 12 × 12 × 12     |
|                                     | SCF & XANES (excited state) | 8 × 8 × 4        |

|                    |          |            |          |
|--------------------|----------|------------|----------|
| Lattice parameter: | <i>a</i> | <i>b</i>   | <i>c</i> |
|                    | 2.8222   | = <i>a</i> | 4.2929   |

|     |                                            |          |          |
|-----|--------------------------------------------|----------|----------|
|     | functional coordination of atomic position |          |          |
|     | <i>x</i>                                   | <i>y</i> | <i>z</i> |
| Co1 | 0                                          | 0        | 0        |
| O1  | 1/3                                        | 2/3      | 0.2341   |

|                                     |                             |                                                |
|-------------------------------------|-----------------------------|------------------------------------------------|
| <u>O2-LiCoO<sub>2</sub></u>         | Space group:                | <i>P6<sub>3</sub>/mc</i>                       |
|                                     | Unitcell formula:           | Li <sub>2</sub> Co <sub>2</sub> O <sub>4</sub> |
|                                     | Size of supercell:          | 3 × 3 × 1                                      |
| <i>k</i> -point grid <sup>b</sup> : | SCF (grand state)           | 12 × 12 × 12                                   |
|                                     | SCF & XANES (excited state) | 8 × 8 × 8                                      |

|                    |          |            |          |
|--------------------|----------|------------|----------|
| Lattice parameter: | <i>a</i> | <i>b</i>   | <i>c</i> |
|                    | 2.8025   | = <i>a</i> | 9.5358   |

|     |                                            |          |          |
|-----|--------------------------------------------|----------|----------|
|     | functional coordination of atomic position |          |          |
|     | <i>x</i>                                   | <i>y</i> | <i>z</i> |
| Li1 | 1/3                                        | 2/3      | 0.2412   |
| Co1 | 2/3                                        | 1/3      | 0        |
| O1  | 0                                          | 0        | 0.1082   |
| O2  | 2/3                                        | 1/3      | 0.3917   |

|                                                       |                             |                                                |
|-------------------------------------------------------|-----------------------------|------------------------------------------------|
| <u>T<sup>#</sup>2-Li<sub>0.5</sub>CoO<sub>2</sub></u> | Space group:                | <i>P2</i>                                      |
|                                                       | Unitcell formula:           | Li <sub>2</sub> Co <sub>4</sub> O <sub>8</sub> |
|                                                       | Size of supercell:          | 3 × 2 × 1                                      |
| <i>k</i> -point grid <sup>b</sup> :                   | SCF (grand state)           | 12 × 12 × 12                                   |
|                                                       | SCF & XANES (excited state) | 4 × 4 × 4                                      |

|                    |          |          |          |
|--------------------|----------|----------|----------|
| Lattice parameter: | <i>a</i> | <i>b</i> | <i>c</i> |
|                    | 2.8547   | 9.7901   | 4.8648   |

|     |                                            |          |          |
|-----|--------------------------------------------|----------|----------|
|     | functional coordination of atomic position |          |          |
|     | <i>x</i>                                   | <i>y</i> | <i>z</i> |
| Li1 | 0                                          | 1/2      | 0.7314   |
| Li2 | 0                                          | 0        | 0        |
| Co1 | 0.8519                                     | 0.7500   | 0.3661   |
| Co2 | 0.359                                      | 0.7500   | 0.8654   |
| O1  | 0.6496                                     | 0.1512   | 0.1978   |
| O2  | 0.3502                                     | 0.6508   | 0.5337   |
| O3  | 0.1421                                     | 0.1525   | 0.7031   |
| O4  | 0.8578                                     | 0.6531   | 0.0285   |

|                                     |                             |                                |
|-------------------------------------|-----------------------------|--------------------------------|
| <u>O2-CoO<sub>2</sub></u>           | Space group:                | <i>P6<sub>3</sub>/mc</i>       |
|                                     | Unitcell formula:           | Co <sub>2</sub> O <sub>4</sub> |
|                                     | Size of supercell:          | 3 × 3 × 1                      |
| <i>k</i> -point grid <sup>b</sup> : | SCF (grand state)           | 12 × 12 × 12                   |
|                                     | SCF & XANES (excited state) | 8 × 8 × 8                      |

|                    |                     |            |                     |
|--------------------|---------------------|------------|---------------------|
| Lattice parameter: | <i>a</i>            | <i>b</i>   | <i>c</i>            |
|                    | 2.8264 <sup>a</sup> | = <i>a</i> | 8.7259 <sup>a</sup> |

|     |                                            |          |          |
|-----|--------------------------------------------|----------|----------|
|     | functional coordination of atomic position |          |          |
|     | <i>x</i>                                   | <i>y</i> | <i>z</i> |
| Co1 | 2/3                                        | 1/3      | 0        |
| O1  | 0                                          | 0        | 0.1058   |
| O2  | 2/3                                        | 1/3      | 0.3942   |

<sup>a</sup> Optimized using WIEN2k.

<sup>b</sup> GS and ES denote the ground and excited states, respectively.

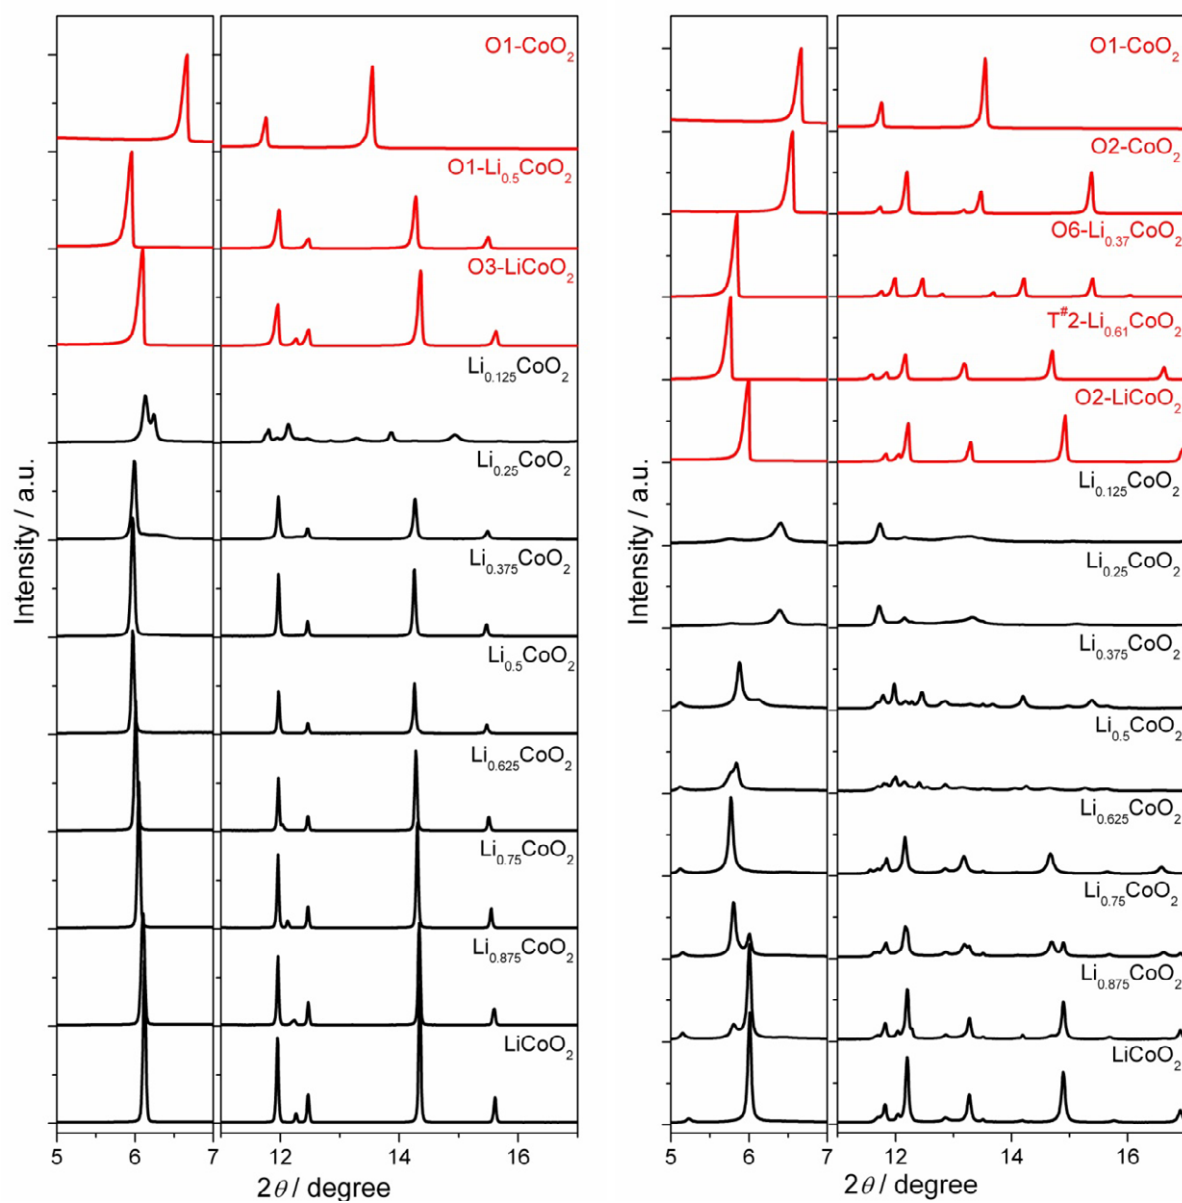

Figure S2. Synchrotron X-ray diffraction patterns of electrochemical lithium-ion deintercalated samples of O3-LiCoO<sub>2</sub> and O2-LiCoO<sub>2</sub> drawn by black lines. The simulated patterns are also displayed by red lines.
